# Supplementary material
Source: PubMed Central journal article supplement (PMC304114)
Supplement: pnas_2235619100_8.pdf [file pnas_2235619100_8.pdf]

\* \* \*

|       |                     |
|-------|---------------------|
| TRPV4 | TFSAFLLDLTKLTIGMGDL |
| TRPV1 | SLYSTCLELTKFTIGMGDL |
| TRPV2 | SILDASLELTKFTIGMGEL |
| TRPV3 | SFSDAVLELTKLTIGLGDL |
| TRPV5 | TAMFSTFELF-LTIIDGPA |
| OSM-9 | TFPETFITLFRASMGYDY  |
