# Supplementary material
Source: PubMed Central journal article supplement (PMC304114)

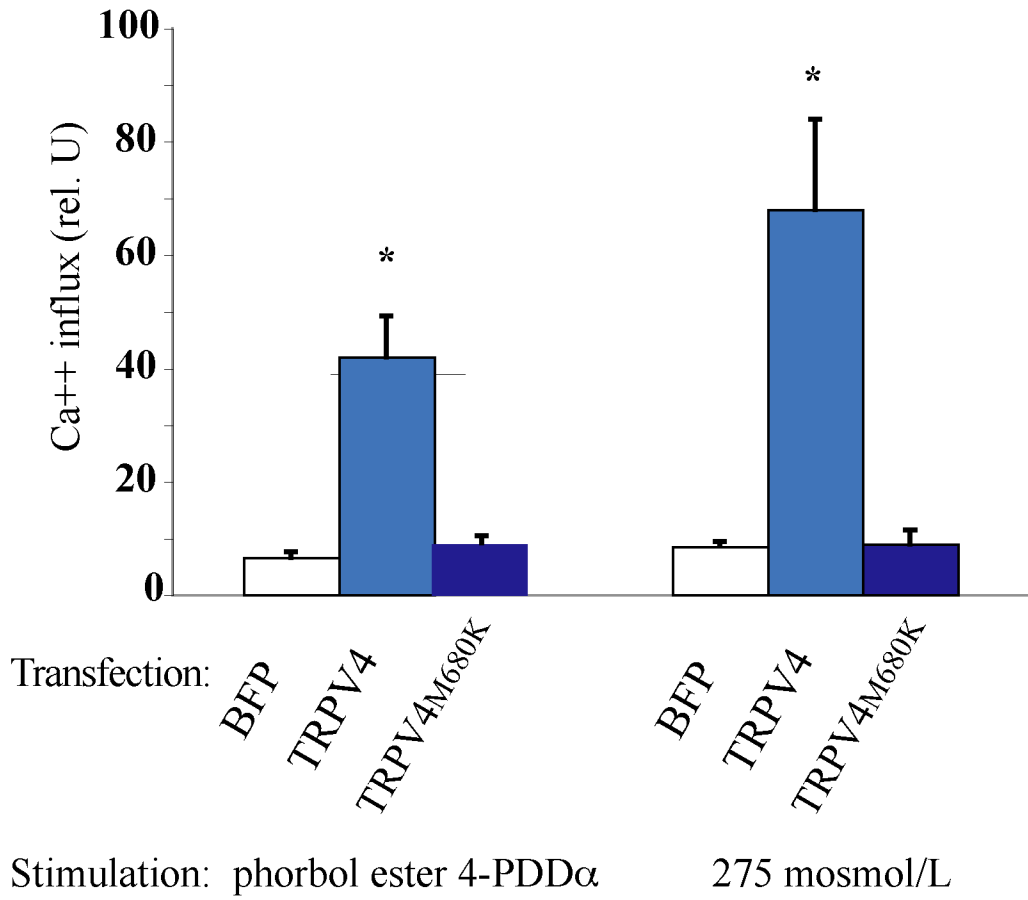

Supplement: pnas_2235619100_10.pdf [file pnas_2235619100_10.pdf]

*osm-9 ASH::trpv4*

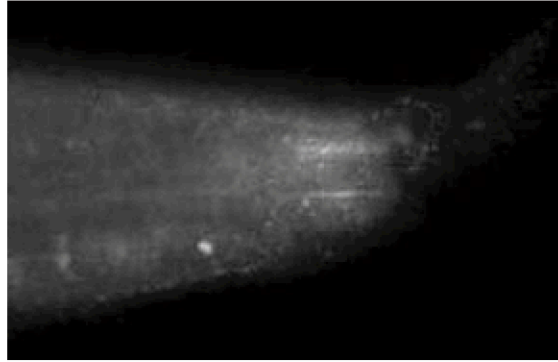

*osm-9 ASH::trpv4 $\Delta$ N $\Delta$ C*

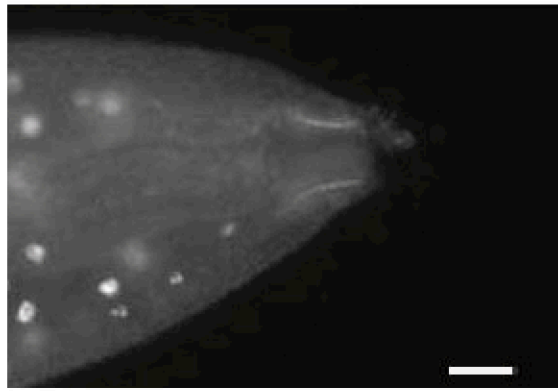

*osm-9 ASH::trpv4<sup>M680K</sup>*

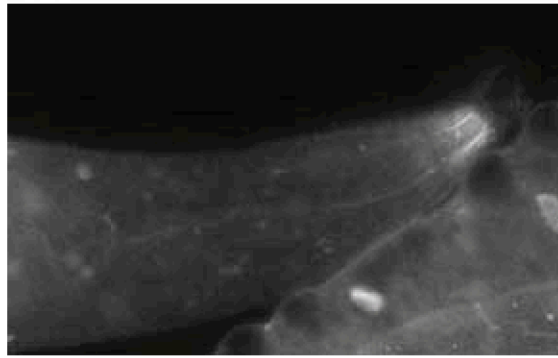

*osm-9*

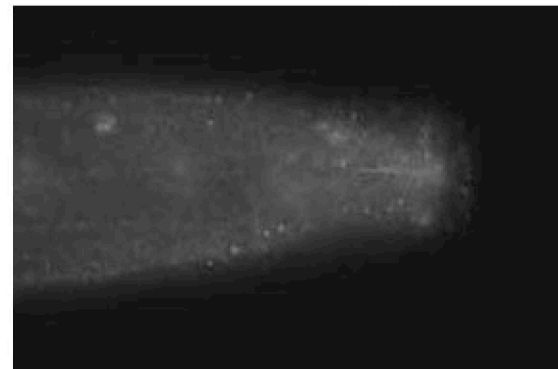

Supplement: pnas_2235619100_12.pdf [file pnas_2235619100_12.pdf]

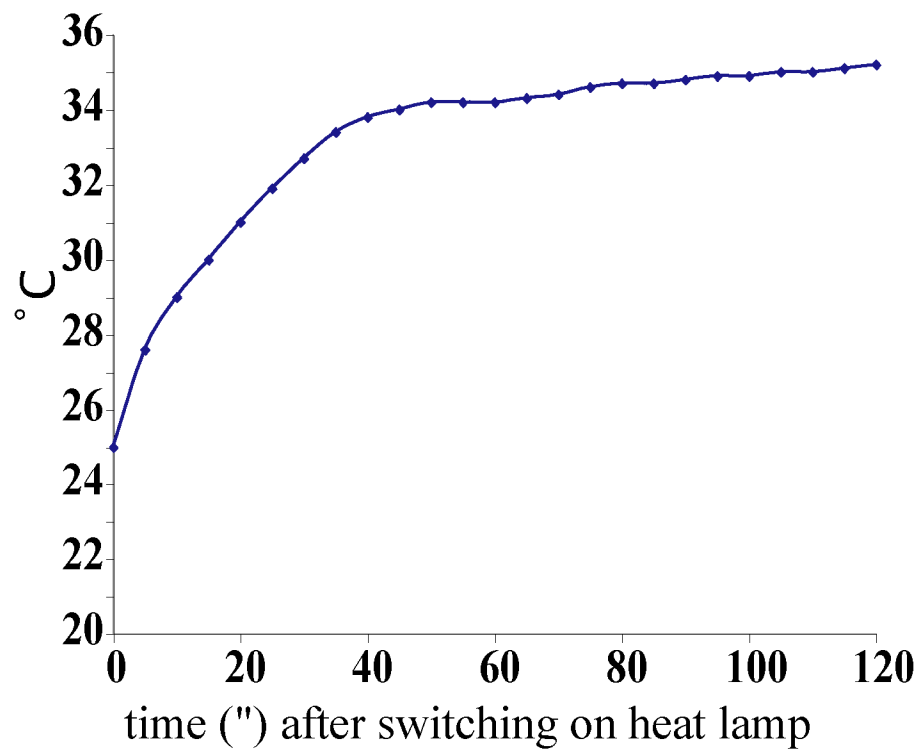

Supplement: pnas_2235619100_14.pdf [file pnas_2235619100_14.pdf]

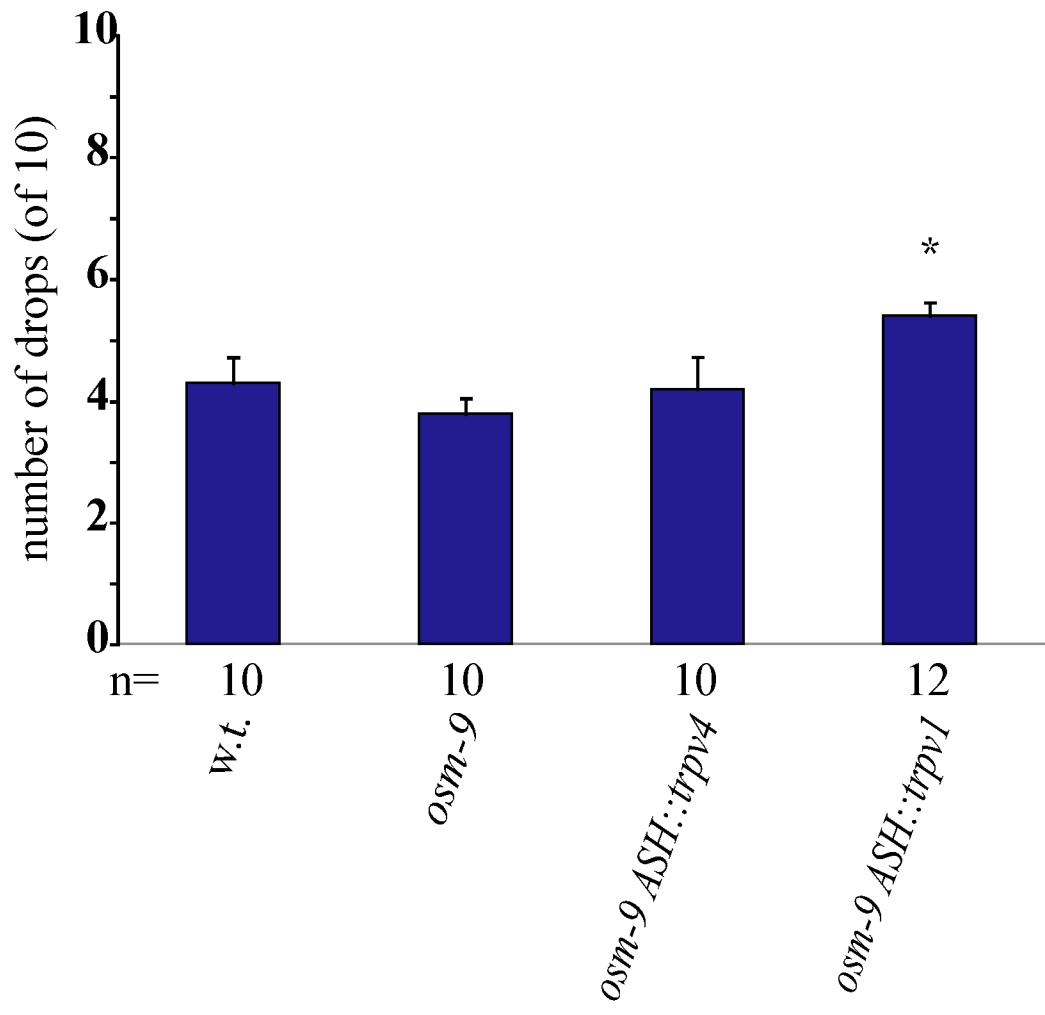

Supplement: pnas_2235619100_16.pdf [file pnas_2235619100_16.pdf]

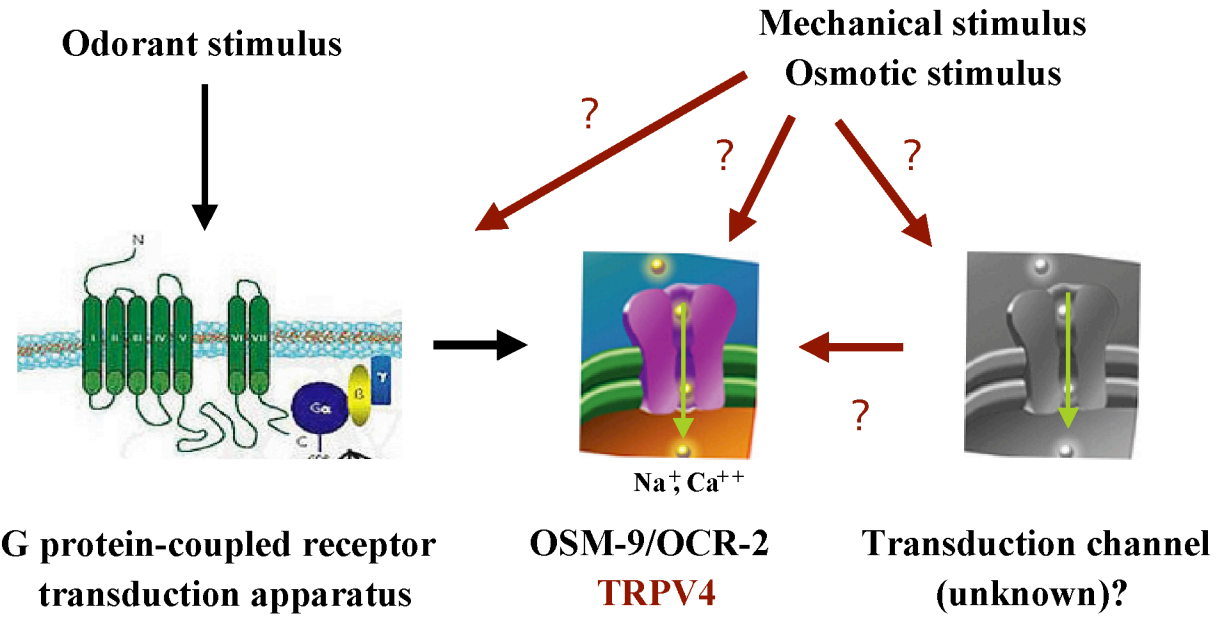

Supplement: pnas_2235619100_18.pdf [file pnas_2235619100_18.pdf]

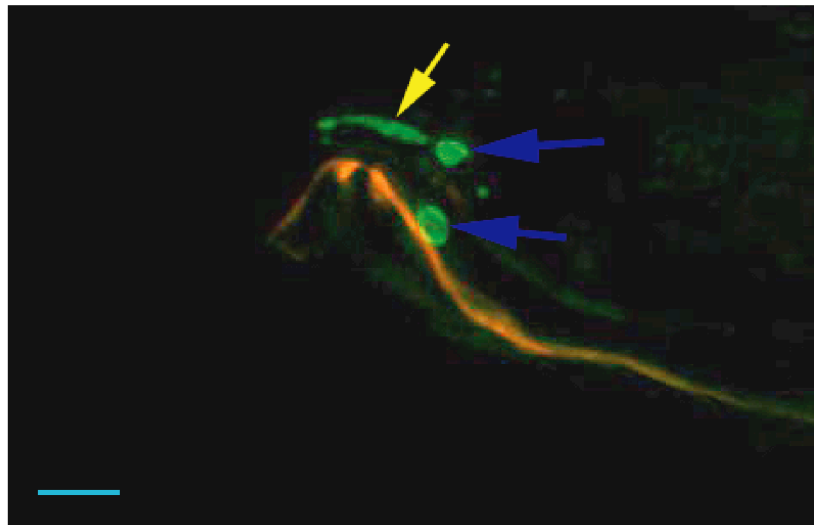

Supplement: pnas_2235619100_6.pdf [file pnas_2235619100_6.pdf]
